# Supplementary material
Source: publisher site journal article supplement (https://www.spandidos-publications.com/1713/downloadSupplementary)

Figure S1. Concentration of RNase 7 proteins in conditioned media and cell extract. The concentration of RNase 7 protein in the conditioned media was significantly higher (\* $P < 0.05$ ) than that in the cell extract.

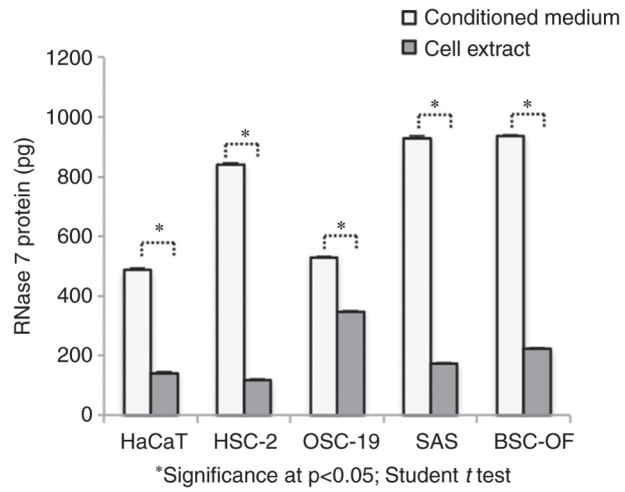

Supplement: Supplementary file 1 [file downloadSupplementary]
